# Supplementary material for: Balance between breadth and depth in human many-alternative decisions
Source: eLife. 2022 Sep 15;11:e76985. doi: 10.7554/eLife.76985 (PMC9578699; doi:10.7554/eLife.76985)
Supplement: Supplementary file 1. [file elife-76985-supp1.docx]

| environment  capacity | poor | neutral | rich |
| --- | --- | --- | --- |
| 2 |  |  |  |
| 3 |  |  |  |
| 4 |  |  |  |
| 5 |  |  |  |
| 6 |  |  |  |
| 7 |  |  |  |
| 8 |  |  |  |
| 9 |  |  |  |
| 10 |  |  |  |
| 16 |  |  |  |
| 32 |  |  |  |

***Tabl S1.*** Participants’ sampling strategy deviates from optimality and tends to be tilted toward depth at low capacity and breadth at high capacity. Results of one-sample Wilcoxon tests against the null hypothesis (=0, no bias towards depth nor depth) of the differences between the optimal () and the observed () number of alternatives sampled averaged per participant for each capacity and environment. statistics and p-values adjusted with Bonferroni corrections for multiple comparisons are reported and significant results (<.05) are highlighted in bold.
