# Supplementary material for: Balance between breadth and depth in human many-alternative decisions
Source: eLife. 2022 Sep 15;11:e76985. doi: 10.7554/eLife.76985 (PMC9578699; doi:10.7554/eLife.76985)
Supplement: Supplementary file 5. [file elife-76985-supp5.docx]

|  | depth | square root | linear | optimal | power |
| --- | --- | --- | --- | --- | --- |
| pure breadth |  |  |  |  |  |
| depth |  |  |  |  |  |
| square root |  |  |  |  |  |
| linear |  |  |  |  |  |
| optimal |  |  |  |  |  |

***Table S5***. Summary of the pair-wise comparisons (Wilcoxon Matched Pairs Signed-Ranks test) of the 4-folds averaged CVLL between all six models using Gaussian distributed noise. P-values are adjusted with Bonferroni corrections and significative differences (*p* <.05) are highlighted in bold. Models are ordered from worst (pure breadth) to best (free power-law).
